# Supplementary material for: The Frequency of Primary Healthcare Contacts Preceding the Diagnosis of Lower-Extremity Arterial Disease: Do Women Consult General Practice Differently?
Source: MDPI journal article supplement (doi:10.3390/jcm11133666), 2022-06-24
Supplement: s1 [file s1]

## Supplementary material

**Table S1:** number of GP contacts six months prior to the index date

| Number of health care contacts | PAD cohort  |             | Reference cohort |             | Entire cohort |             |
|--------------------------------|-------------|-------------|------------------|-------------|---------------|-------------|
|                                | Women (%)   | Men (%)     | Women (%)        | Men (%)     | Women (%)     | Men (%)     |
| 0                              | 545 (31.0)  | 687 (30.1)  | 2646 (54.5)      | 3367 (60.0) | 3191 (48.3)   | 4054 (51.2) |
| 1                              | 195 (11.1)  | 255 (11.2)  | 499 (10.3)       | 544 (9.6)   | 694 (10.5)    | 799 (10.1)  |
| 2                              | 196 (11.1)  | 232 (10.2)  | 427 (8.8)        | 434 (7.7)   | 623 (9.4)     | 666 (8.4)   |
| 3                              | 156 (8.8)   | 194 (8.5)   | 333 (6.9)        | 334 (5.9)   | 489 (7.4)     | 528 (6.7)   |
| 4                              | 107 (6.1)   | 183 (8.0)   | 227 (4.8)        | 254 (4.5)   | 334 (5.1)     | 437 (5.1)   |
| 5                              | 83 (4.7)    | 145 (6.3)   | 157 (3.2)        | 175 (3.1)   | 240 (3.6)     | 320 (4.0)   |
| 6                              | 80 (4.5)    | 99 (4.3)    | 134 (2.8)        | 125 (2.2)   | 214 (3.2)     | 224 (2.8)   |
| 7                              | 65 (3.7)    | 106 (4.6)   | 95 (1.9)         | 95 (1.7)    | 160 (2.4)     | 201 (2.5)   |
| 8                              | 49 (2.8)    | 63 (2.7)    | 69 (1.4)         | 69 (1.2)    | 118 (1.8)     | 132 (1.7)   |
| 9                              | 45 (2.5)    | 56 (2.4)    | 59 (1.2)         | 48 (0.9)    | 104 (1.6)     | 104 (1.3)   |
| 10                             | 50 (2.8)    | 54 (2.4)    | 48 (1.0)         | 40 (0.7)    | 98 (1.5)      | 94 (1.2)    |
| >10                            | 190 (10.8)  | 209 (9.1)   | 157 (3.2)        | 150 (2.7)   | 347 (5.2)     | 359 (4.5)   |
| <b>Total</b>                   | <b>1761</b> | <b>2283</b> | <b>4851</b>      | <b>5635</b> | <b>6612</b>   | <b>7918</b> |
| Minimum                        | 0           | 0           | 0                | 0           | 0             | 0           |
| Maximum                        | 79          | 57          | 35               | 66          | 79            | 66          |
| Mean                           | 4.06        | 3.97        | 1.94             | 1.67        | 2.50          | 2.33        |
| SD                             | 5.44        | 5.17        | 3.39             | 3.32        | 4.15          | 4.08        |
| Median                         | 2           | 2           | 0                | 0           | 1             | 0           |
| IQR                            | 6           | 6           | 3                | 2           | 3             | 3           |
| Variance                       | 29.59       | 26.72       | 11.49            | 11.02       | 17.22         | 16.64       |
| Skewness                       | 3.29        | 2.74        | 2.95             | 4.58        | 3.49          | 3.71        |

LEAD: lower extremity arterial disease

SD: standard deviation

IQR: interquartile range

**Table S2:** Interaction regression model in the PAD and reference cohort

| <i>Predictors</i>                   | LEAD cohort                                        |                    |                                                |                    | Reference cohort                                   |                    |                                                |                    |
|-------------------------------------|----------------------------------------------------|--------------------|------------------------------------------------|--------------------|----------------------------------------------------|--------------------|------------------------------------------------|--------------------|
|                                     | Negative binomial model <sup>1</sup> (Count model) |                    | Zero-inflated model <sup>2</sup> (Logit model) |                    | Negative binomial model <sup>1</sup> (Count model) |                    | Zero-inflated model <sup>2</sup> (Logit model) |                    |
|                                     | <i>Exp (β)*</i>                                    | <i>CI</i>          | <i>Exp (β)**</i>                               | <i>CI</i>          | <i>Exp (β)*</i>                                    | <i>CI</i>          | <i>Exp (β)**</i>                               | <i>CI</i>          |
| <b>Intercept<sup>+</sup></b>        | <b>2.77</b>                                        | <b>2.36 – 3.25</b> | <b>2.45</b>                                    | <b>1.68 – 3.56</b> | <b>1.53</b>                                        | <b>1.36 – 1.72</b> | <b>6.86</b>                                    | <b>5.45 – 8.62</b> |
| Sex (men)                           | 0.91                                               | 0.75 – 1.12        | 1.20                                           | 0.72 – 2.01        | 1.21                                               | 1.04 – 1.41        | 1.18                                           | 0.87 – 1.60        |
| Diabetes mellitus                   | 1.93                                               | 1.72 – 2.16        | 0.08                                           | 0.02 – 0.23        | 2.02                                               | 1.84 – 2.21        | 0.01                                           | 0.00 – 0.14        |
| Hypertension                        | 1.20                                               | 1.05 – 1.38        | 0.14                                           | 0.09 – 0.24        | 1.48                                               | 1.34 – 1.65        | 0.06                                           | 0.04 – 0.09        |
| Hyperlipidemia                      | 1.08                                               | 0.96 – 1.21        | 0.43                                           | 0.22 – 0.84        | 1.11                                               | 1.01 – 1.23        | 0.14                                           | 0.08 – 0.25        |
| Musculoskeletal                     | 1.04                                               | 0.92 – 1.17        | 0.36                                           | 0.24 – 0.56        | 1.12                                               | 1.03 – 1.23        | 0.34                                           | 0.26 – 0.45        |
| Rheumatic disease                   | 1.12                                               | 0.90 – 1.38        | 0.55                                           | 0.20 – 1.49        | 1.33                                               | 1.12 – 1.58        | 0.16                                           | 0.07 – 0.38        |
| Vascular disease <sup>3</sup>       | 1.19                                               | 1.03 – 1.39        | 0.38                                           | 0.12 – 1.19        | 1.15                                               | 1.01 – 1.31        | 0.10                                           | 0.03 – 0.39        |
| MI <sup>4</sup>                     | 1.19                                               | 1.01 – 1.39        | 0.17                                           | 0.03 – 0.96        | 1.41                                               | 1.21 – 1.64        | 0.05                                           | 0.01 – 0.31        |
| Tobacco abuse <sup>5</sup>          | 1.13                                               | 1.00 – 1.28        | 0.68                                           | 0.43 – 1.09        | 1.15                                               | 1.00 – 1.31        | 0.38                                           | 0.24 – 0.61        |
| Age <sup>6</sup>                    | 1.01                                               | 1.00 – 1.01        | 0.98                                           | 0.97 – 0.99        | 1.00                                               | 1.00 – 1.01        | 0.96                                           | 0.95 – 0.97        |
| Sex * Diabetes mellitus             | 0.86                                               | 0.75 – 1.00        | 0.31                                           | 0.04 – 2.45        | 0.98                                               | 0.86 – 1.11        | 1.47                                           | 0.04 – 48.97       |
| Sex * Hypertension                  | 0.99                                               | 0.83 – 1.17        | 0.58                                           | 0.26 – 1.30        | 0.80                                               | 0.69 – 0.91        | 0.97                                           | 0.59 – 1.59        |
| Sex * Hyperlipidemia                | 0.99                                               | 0.84 – 1.15        | 0.63                                           | 0.24 – 1.63        | 0.95                                               | 0.83 – 1.09        | 2.45                                           | 1.23 – 4.88        |
| Sex * Musculoskeletal               | 1.07                                               | 0.92 – 1.25        | 1.04                                           | 0.57 – 1.88        | 0.92                                               | 0.81 – 1.04        | 1.02                                           | 0.70 – 1.49        |
| Sex * Rheumatic disease             | 0.92                                               | 0.65 – 1.31        | 1.22                                           | 0.14 – 10.84       | 0.86                                               | 0.66 – 1.12        | 1.17                                           | 0.31 – 4.49        |
| Sex * Vascular disease <sup>3</sup> | 0.99                                               | 0.81 – 1.20        | 0.21                                           | 0.03 – 1.61        | 1.08                                               | 0.90 – 1.30        | 2.28                                           | 0.52 – 9.92        |
| Sex * MI <sup>4</sup>               | 1.04                                               | 0.86 – 1.27        | 0.50                                           | 0.06 – 3.98        | 0.80                                               | 0.66 – 0.97        | 0.82                                           | 0.10 – 6.71        |
| Sex * Tobacco abuse <sup>5</sup>    | 1.14                                               | 0.97 – 1.33        | 0.85                                           | 0.43 – 1.66        | 1.07                                               | 0.89 – 1.28        | 0.91                                           | 0.48 – 1.71        |
| Sex * Age <sup>6</sup>              | 1.00                                               | 0.99 – 1.01        | 1.00                                           | 0.98 – 1.02        | 1.00                                               | 0.99 – 1.00        | 1.00                                           | 0.99 – 1.02        |

CI: 95% confidence interval

+ The intercept refers to a woman with mean age, the other exponent betas for the different predictor and interactions should be interpreted as factors.

\* Exponent beta in the negative binomial part of the model is interpreted as a count

\*\* Exponent beta in the zero inflated (logit model) is interpreted as an odd ratio

<sup>1</sup> Coefficients for the count part of the model are interpreted as predicted number of health care contact<sup>2</sup> The logistic part of the model predicts non-occurrence of health care contact<sup>3</sup> Vascular disease is defined as ICDPC codes K89 (Transient ischemic attack) and K90 (Stroke)<sup>4</sup> History of myocardial infarction<sup>5</sup> History of tobacco abuse was defined as patients with ICDPC code P17 at baseline<sup>6</sup> Age was mean centred for all analyses.
